# Supplementary material
Source: ML conference proceedings conference paper supplement (https://aclanthology.org/D19-1344)
Supplement: Attachment [file D19-1344.Attachment.zip]

# Give Me A Perfect Name

## Anonymous ACL submission

### Abstract

This paper deals with the multi-label text classification problem where the descriptions of classes are available.

### 1 Introduction

blablabla

### 2 Related Work

blablabla

### 3 Model

Manuscripts must be in two-column format. Exceptions to the two-column format include the title, authors' names and complete addresses, which must be centered at the top of the first page, and any full-width figures or tables (see the guidelines in Subsection 3.6). **Type single-spaced.** Start all pages directly under the top margin. See the guidelines later regarding formatting the first page. The manuscript should be printed single-sided and its length should not exceed the maximum page limit described in Section ?? . Pages are numbered for initial submission. However, **do not number the pages in the camera-ready version.**

By uncommenting `\aclfinalcopy` at the top of this document, it will compile to produce an example of the camera-ready formatting; by leaving it commented out, the document will be anonymized for initial submission. When you first create your submission on softconf, please fill in your submitted paper ID where \*\*\* appears in the `\def\aclpaperid{***}` definition at the top.

The review process is double-blind, so do not include any author information (names, addresses) when submitting a paper for review. However, you should maintain space for names and addresses so that they will fit in the final (accepted) version. The ACL 2019 L<sup>A</sup>T<sub>E</sub>X style will create a titlebox

space of 2.5in for you when `\aclfinalcopy` is commented out.

### 3.1 The Ruler

The ACL 2019 style defines a printed ruler which should be presented in the version submitted for review. The ruler is provided in order that reviewers may comment on particular lines in the paper without circumlocution. If you are preparing a document without the provided style files, please arrange for an equivalent ruler to appear on the final output pages. The presence or absence of the ruler should not change the appearance of any other content on the page. The camera ready copy should not contain a ruler. (L<sup>A</sup>T<sub>E</sub>X users may uncomment the `\aclfinalcopy` command in the document preamble.)

Reviewers: note that the ruler measurements do not align well with lines in the paper – this turns out to be very difficult to do well when the paper contains many figures and equations, and, when done, looks ugly. In most cases one would expect that the approximate location will be adequate, although you can also use fractional references (*e.g.*, the first paragraph on this page ends at mark 108.5).

### 3.2 Electronically-available resources

ACL provides this description in L<sup>A</sup>T<sub>E</sub>X2<sub>ε</sub> (`acl2019.tex`) and PDF format (`acl2019.pdf`), along with the L<sup>A</sup>T<sub>E</sub>X2<sub>ε</sub> style file used to format it (`acl2019.sty`) and an ACL bibliography style (`aclnatbib.bst`) and example bibliography (`acl2019.bib`). These files are all available at <http://acl2019.org/downloads/acl2019-latex.zip>. We strongly recommend the use of these style files, which have been appropriately tailored for the ACL 2019 proceedings.

### 3.3 Format of Electronic Manuscript

For the production of the electronic manuscript you must use Adobe’s Portable Document Format (PDF). PDF files are usually produced from L<sup>A</sup>T<sub>E</sub>X using the *pdflatex* command. If your version of L<sup>A</sup>T<sub>E</sub>X produces Postscript files, you can convert these into PDF using *ps2pdf* or *dvipdf*. On Windows, you can also use Adobe Distiller to generate PDF.

Please make sure that your PDF file includes all the necessary fonts (especially tree diagrams, symbols, and fonts with Asian characters). When you print or create the PDF file, there is usually an option in your printer setup to include none, all or just non-standard fonts. Please make sure that you select the option of including ALL the fonts. **Before sending it, test your PDF by printing it from a computer different from the one where it was created.** Moreover, some word processors may generate very large PDF files, where each page is rendered as an image. Such images may reproduce poorly. In this case, try alternative ways to obtain the PDF. One way on some systems is to install a driver for a postscript printer, send your document to the printer specifying “Output to a file”, then convert the file to PDF.

It is of utmost importance to specify the **A4 format** (21 cm x 29.7 cm) when formatting the paper. When working with *dvips*, for instance, one should specify `-t a4`. Or using the command `\special{papersize=210mm,297mm}` in the latex preamble (directly below the `\usepackage` commands). Then using *dvipdf* and/or *pdflatex* which would make it easier for some.

Print-outs of the PDF file on A4 paper should be identical to the hardcopy version. If you cannot meet the above requirements about the production of your electronic submission, please contact the publication chairs as soon as possible.

### 3.4 Layout

Format manuscripts two columns to a page, in the manner these instructions are formatted. The exact dimensions for a page on A4 paper are:

- Left and right margins: 2.5 cm
- Top margin: 2.5 cm
- Bottom margin: 2.5 cm
- Column width: 7.7 cm

| Type of Text        | Font Size | Style |
|---------------------|-----------|-------|
| paper title         | 15 pt     | bold  |
| author names        | 12 pt     | bold  |
| author affiliation  | 12 pt     |       |
| the word “Abstract” | 12 pt     | bold  |
| section titles      | 12 pt     | bold  |
| subsection titles   | 11 pt     | bold  |
| document text       | 11 pt     |       |
| captions            | 10 pt     |       |
| abstract text       | 10 pt     |       |
| bibliography        | 10 pt     |       |
| footnotes           | 9 pt      |       |

Table 1: Font guide.

- Column height: 24.7 cm
- Gap between columns: 0.6 cm

Papers should not be submitted on any other paper size. If you cannot meet the above requirements about the production of your electronic submission, please contact the publication chairs above as soon as possible.

### 3.5 Fonts

For reasons of uniformity, Adobe’s **Times Roman** font should be used. In L<sup>A</sup>T<sub>E</sub>X2e this is accomplished by putting

```
\usepackage{times}
\usepackage{latexsym}
```

in the preamble. If Times Roman is unavailable, use **Computer Modern Roman** (L<sup>A</sup>T<sub>E</sub>X2e’s default). Note that the latter is about 10% less dense than Adobe’s Times Roman font.

### 3.6 The First Page

Center the title, author’s name(s) and affiliation(s) across both columns. Do not use footnotes for affiliations. Do not include the paper ID number assigned during the submission process. Use the two-column format only when you begin the abstract.

**Title:** Place the title centered at the top of the first page, in a 15-point bold font. (For a complete guide to font sizes and styles, see Table 1) Long titles should be typed on two lines without a blank line intervening. Approximately, put the title at 2.5 cm from the top of the page, followed by a blank line, then the author’s names(s), and the affiliation on the following line. Do not use

| Command             | Output | Command              | Output |
|---------------------|--------|----------------------|--------|
| <code>{\ "a}</code> | ä      | <code>{\ c c}</code> | ç      |
| <code>{\ ^e}</code> | ê      | <code>{\ u g}</code> | ğ      |
| <code>{\ 'i}</code> | ï      | <code>{\ l}</code>   | ł      |
| <code>{\ .I}</code> | İ      | <code>{\ ~n}</code>  | ñ      |
| <code>{\ o}</code>  | ø      | <code>{\ H o}</code> | ö      |
| <code>{\ 'u}</code> | ú      | <code>{\ v r}</code> | ř      |
| <code>{\ aa}</code> | å      | <code>{\ ss}</code>  | ß      |

Table 2: Example commands for accented characters, to be used in, e.g., BibTeX names.

only initials for given names (middle initials are allowed). Do not format surnames in all capitals (e.g., use “Mitchell” not “MITCHELL”). Do not format title and section headings in all capitals as well except for proper names (such as “BLEU”) that are conventionally in all capitals. The affiliation should contain the author’s complete address, and if possible, an electronic mail address. Start the body of the first page 7.5 cm from the top of the page.

The title, author names and addresses should be completely identical to those entered to the electronic paper submission website in order to maintain the consistency of author information among all publications of the conference. If they are different, the publication chairs may resolve the difference without consulting with you; so it is in your own interest to double-check that the information is consistent.

**Abstract:** Type the abstract at the beginning of the first column. The width of the abstract text should be smaller than the width of the columns for the text in the body of the paper by about 0.6 cm on each side. Center the word **Abstract** in a 12 point bold font above the body of the abstract. The abstract should be a concise summary of the general thesis and conclusions of the paper. It should be no longer than 200 words. The abstract text should be in 10 point font.

**Text:** Begin typing the main body of the text immediately after the abstract, observing the two-column format as shown in the present document. Do not include page numbers.

**Indent:** Indent when starting a new paragraph, about 0.4 cm. Use 11 points for text and subsection headings, 12 points for section headings and 15 points for the title.

### 3.7 Sections

**Headings:** Type and label section and subsection headings in the style shown on the present document. Use numbered sections (Arabic numerals)

in order to facilitate cross references. Number subsections with the section number and the subsection number separated by a dot, in Arabic numerals. Do not number subsubsections.

**Citations:** Citations within the text appear in parentheses as (Gusfield, 1997) or, if the author’s name appears in the text itself, as Gusfield (1997). Using the provided L<sup>A</sup>T<sub>E</sub>X style, the former is accomplished using `\cite` and the latter with `\shortcite` or `\newcite`. Collapse multiple citations as in (Gusfield, 1997; Aho and Ullman, 1972); this is accomplished with the provided style using commas within the `\cite` command, e.g., `\cite{Gusfield:97,Aho:72}`. Append lowercase letters to the year in cases of ambiguities. Treat double authors as in (Aho and Ullman, 1972), but write as in (Chandra et al., 1981) when more than two authors are involved. Collapse multiple citations as in (Gusfield, 1997; Aho and Ullman, 1972). Also refrain from using full citations as sentence constituents.

We suggest that instead of

“(Gusfield, 1997) showed that ...”

you use

“Gusfield (1997) showed that ...”

If you are using the provided L<sup>A</sup>T<sub>E</sub>X and BibTeX style files, you can use the command `\citete` (cite in text) to get “author (year)” citations.

You can use the command `\citealp` (alternative cite without parentheses) to get “author year” citations (which is useful for using citations within parentheses, as in Gusfield, 1997).

If the BibTeX file contains DOI fields, the paper title in the references section will appear as a hyperlink to the DOI, using the `hyperref` L<sup>A</sup>T<sub>E</sub>X package. To disable the `hyperref` package, load the style file with the `nohyperref` option:

```
\usepackage[nohyperref]{acl2019}
```

**Compilation Issues:** Some of you might encounter the following error during compilation:

“\pdfendlink ended up in different nesting level than \pdfstartlink.”

This happens when `pdflatex` is used and a citation splits across a page boundary. To fix this, the style file contains a patch consisting of the following two lines: (1) `\RequirePackage{etoolbox}` (line 454 in `acl2019.sty`), and (2) A long line below (line 455 in `acl2019.sty`).

| output           | natbib       | previous ACL style files |
|------------------|--------------|--------------------------|
| (Gusfield, 1997) | \citep       | \cite                    |
| Gusfield (1997)  | \citet       | \newcite                 |
| (1997)           | \citeyearpar | \shortcite               |

Table 3: Citation commands supported by the style file. The citation style is based on the natbib package and supports all natbib citation commands. It also supports commands defined in previous ACL style files for compatibility.

If you still encounter compilation issues even with the patch enabled, disable the patch by commenting the two lines, and then disable the hyperref package (see above), recompile and see the problematic citation. Next rewrite that sentence containing the citation. (See, *e.g.*, <http://tug.org/errors.html>)

**Digital Object Identifiers:** As part of our work to make ACL materials more widely used and cited outside of our discipline, ACL has registered as a CrossRef member, as a registrant of Digital Object Identifiers (DOIs), the standard for registering permanent URNs for referencing scholarly materials. As of 2017, we are requiring all camera-ready references to contain the appropriate DOIs (or as a second resort, the hyperlinked ACL Anthology Identifier) to all cited works. Thus, please ensure that you use BibTeX records that contain DOI or URLs for any of the ACL materials that you reference. Appropriate records should be found for most materials in the current ACL Anthology at <http://aclanthology.info/>.

As examples, we cite (Goodman et al., 2016) to show you how papers with a DOI will appear in the bibliography. We cite (Harper, 2014) to show how papers without a DOI but with an ACL Anthology Identifier will appear in the bibliography.

As reviewing will be double-blind, the submitted version of the papers should not include the authors’ names and affiliations. Furthermore, self-references that reveal the author’s identity, *e.g.*,

“We previously showed (Gusfield, 1997) ...”

should be avoided. Instead, use citations such as

“Gusfield (1997) previously showed ... ”

Any preliminary non-archival versions of submitted papers should be listed in the submission form but not in the review version of the paper. ACL 2019 reviewers are generally aware that authors may present preliminary versions of their

work in other venues, but will not be provided the list of previous presentations from the submission form.

**Please do not use anonymous citations** and do not include when submitting your papers. Papers that do not conform to these requirements may be rejected without review.

**References:** Gather the full set of references together under the heading **References**; place the section before any Appendices. Arrange the references alphabetically by first author, rather than by order of occurrence in the text. By using a .bib file, as in this template, this will be automatically handled for you. See the \bibliography commands near the end for more.

Provide as complete a citation as possible, using a consistent format, such as the one for *Computational Linguistics* or the one in the *Publication Manual of the American Psychological Association* (American Psychological Association, 1983). Use of full names for authors rather than initials is preferred. A list of abbreviations for common computer science journals can be found in the *ACM Computing Reviews* (for *Computing Machinery*, 1983).

The L<sup>A</sup>T<sub>E</sub>X and BibTeX style files provided roughly fit the American Psychological Association format, allowing regular citations, short citations and multiple citations as described above.

- Example citing an arxiv paper: (Rasooli and Tetreault, 2015).
- Example article in journal citation: (Ando and Zhang, 2005).
- Example article in proceedings, with location: (Borschinger and Johnson, 2011).
- Example article in proceedings, without location: (Andrew and Gao, 2007).

See corresponding .bib file for further details.

Submissions should accurately reference prior and related work, including code and data. If a



piece of prior work appeared in multiple venues, the version that appeared in a refereed, archival venue should be referenced. If multiple versions of a piece of prior work exist, the one used by the authors should be referenced. Authors should not rely on automated citation indices to provide accurate references for prior and related work.

**Appendices:** Appendices, if any, directly follow the text and the references (but see above). Letter them in sequence and provide an informative title: **Appendix A. Title of Appendix.**

### 3.8 Footnotes

**Footnotes:** Put footnotes at the bottom of the page and use 9 point font. They may be numbered or referred to by asterisks or other symbols.<sup>1</sup> Footnotes should be separated from the text by a line.<sup>2</sup>

### 3.9 Graphics

**Illustrations:** Place figures, tables, and photographs in the paper near where they are first discussed, rather than at the end, if possible. Wide illustrations may run across both columns. Color illustrations are discouraged, unless you have verified that they will be understandable when printed in black ink.

**Captions:** Provide a caption for every illustration; number each one sequentially in the form: “Figure 1. Caption of the Figure.” “Table 1. Caption of the Table.” Type the captions of the figures and tables below the body, using 10 point text. Captions should be placed below illustrations. Captions that are one line are centered (see Table 1). Captions longer than one line are left-aligned (see Table 2). Do not overwrite the default caption sizes. The `acl2019.sty` file is compatible with the caption and subcaption packages; do not add optional arguments.

### 3.10 Accessibility

In an effort to accommodate people who are color-blind (as well as those printing to paper), grayscale readability for all accepted papers will be encouraged. Color is not forbidden, but authors should ensure that tables and figures do not rely solely on color to convey critical distinctions. A simple criterion: All curves and points in your figures should be clearly distinguishable without color.

<sup>1</sup>This is how a footnote should appear.

<sup>2</sup>Note the line separating the footnotes from the text.

## 4 Experimental Results

### 4.1 Data

### 4.2 WND On Patents

### 4.3 Transferring WND To Papers

## 5 Conclusions

## Acknowledgments

The acknowledgments should go immediately before the references. Do not number the acknowledgments section. Do not include this section when submitting your paper for review.

## Preparing References:

Include your own bib file like this:  
`\bibliographystyle{acl_natbib}`  
`\bibliography{acl2019}`  
 where `acl2019` corresponds to a `acl2019.bib` file.

## References

- Alfred V. Aho and Jeffrey D. Ullman. 1972. *The Theory of Parsing, Translation and Compiling*, volume 1. Prentice-Hall, Englewood Cliffs, NJ.
- American Psychological Association. 1983. *Publications Manual*. American Psychological Association, Washington, DC.
- Rie Kubota Ando and Tong Zhang. 2005. A framework for learning predictive structures from multiple tasks and unlabeled data. *Journal of Machine Learning Research*, 6:1817–1853.
- Galen Andrew and Jianfeng Gao. 2007. Scalable training of L1-regularized log-linear models. In *Proceedings of the 24th International Conference on Machine Learning*, pages 33–40.
- Benjamin Borschinger and Mark Johnson. 2011. A particle filter algorithm for Bayesian wordsegmentation. In *Proceedings of the Australasian Language Technology Association Workshop 2011*, pages 10–18, Canberra, Australia.
- Ashok K. Chandra, Dexter C. Kozen, and Larry J. Stockmeyer. 1981. *Alternation*. *Journal of the Association for Computing Machinery*, 28(1):114–133.
- Association for Computing Machinery. 1983. *Computing Reviews*, 24(11):503–512.
- James Goodman, Andreas Vlachos, and Jason Naradowsky. 2016. *Noise reduction and targeted exploration in imitation learning for abstract meaning representation parsing*. In *Proceedings of the 54th Annual Meeting of the Association for Computational Linguistics (Volume 1: Long Papers)*, pages 1–11. Association for Computational Linguistics.

- Dan Gusfield. 1997. *Algorithms on Strings, Trees and Sequences*. Cambridge University Press, Cambridge, UK.
- Mary Harper. 2014. [Learning from 26 languages: Program management and science in the babel program](#). In *Proceedings of COLING 2014, the 25th International Conference on Computational Linguistics: Technical Papers*, page 1. Dublin City University and Association for Computational Linguistics.
- Mohammad Sadegh Rasooli and Joel R. Tetreault. 2015. [Yara parser: A fast and accurate dependency parser](#). *Computing Research Repository*, arXiv:1503.06733. Version 2.

550  
551  
552  
553  
554  
555  
556  
557  
558  
559  
560  
561  
562  
563  
564  
565  
566  
567  
568  
569  
570  
571  
572  
573  
574  
575  
576  
577  
578  
579  
580  
581  
582  
583  
584  
585  
586  
587  
588  
589  
590  
591  
592  
593  
594  
595  
596  
597  
598  
599
